# Supplementary material for: Impact of exudative diathesis induced by selenium deficiency on LncRNAs and their roles in the oxidative reduction process in broiler chick veins
Source: PubMed Central journal article supplement (PMC5400537; doi:10.18632/oncotarget.14971), 2017-02-01
Supplement: oncotarget-08-20695-s001.pdf [file oncotarget-08-20695-s001.pdf]

# Impact of exudative diathesis induced by selenium deficiency on LncRNAs and their roles in the oxidative reduction process in broiler chick vein

## Supplementary Materials

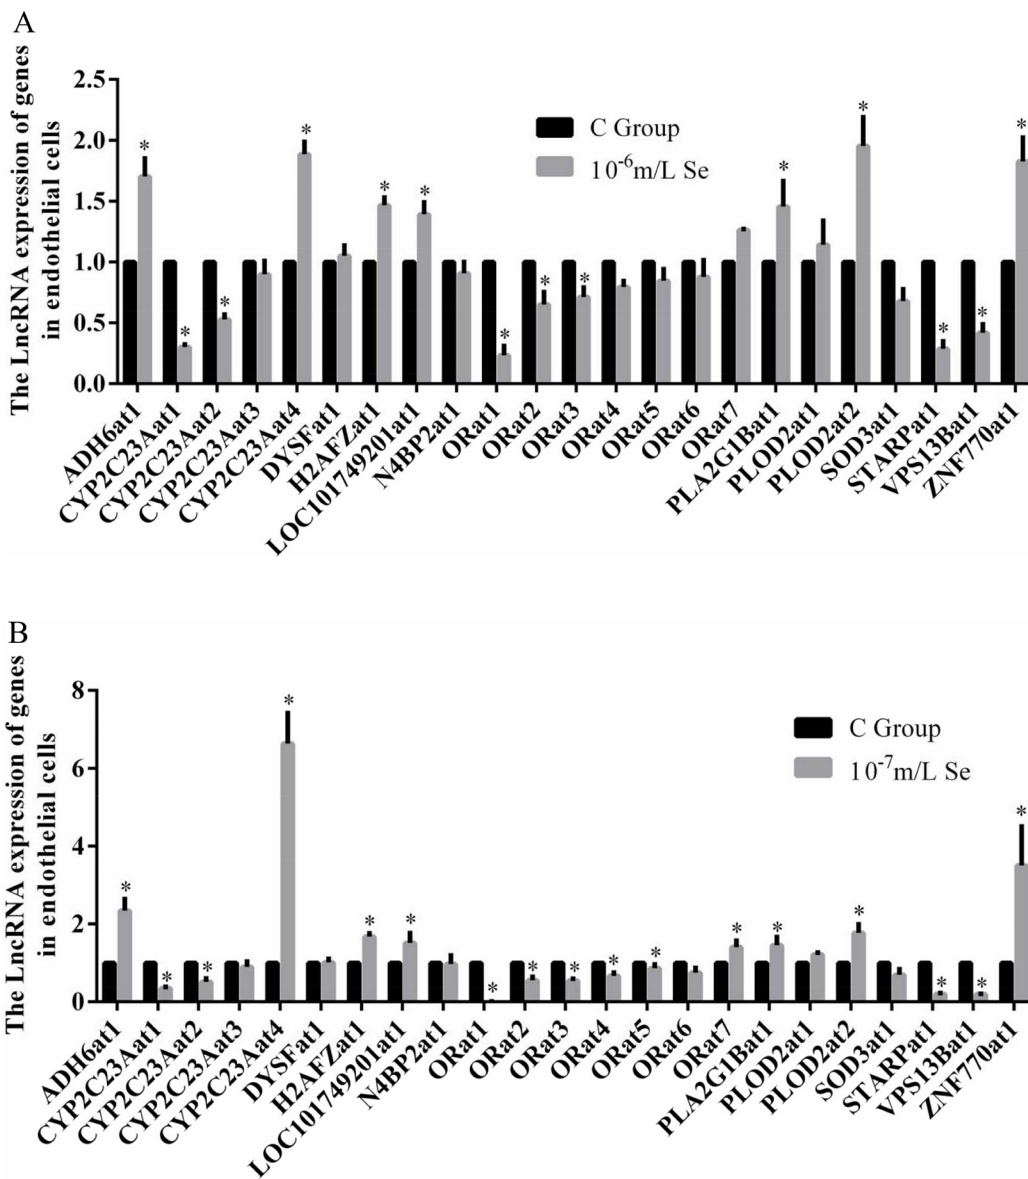

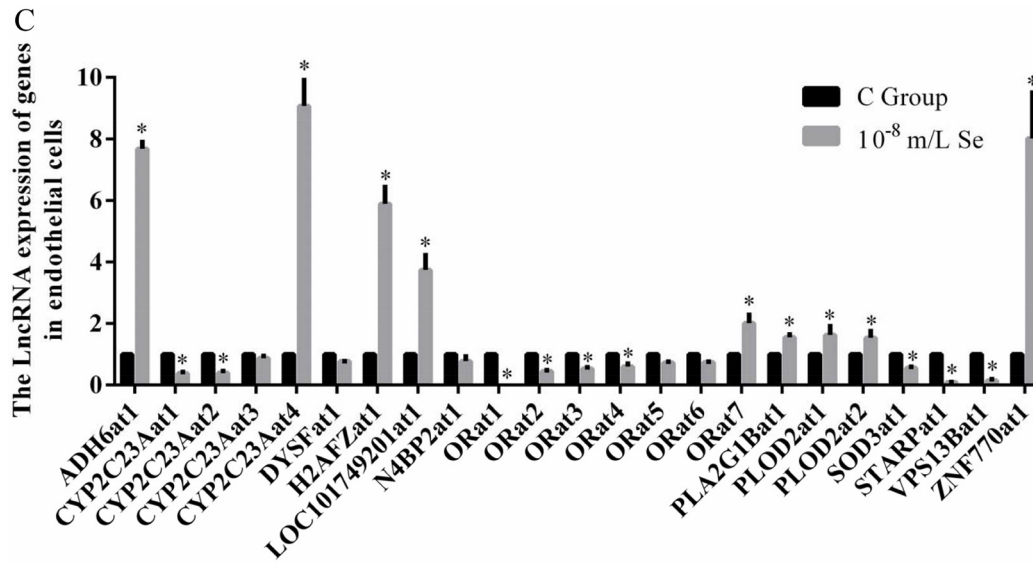

Supplementary Figure 1: Effects of Se on the relative mRNA levels in VECs. (A) 10<sup>-6</sup> m/L Se treated; (B) 10<sup>-7</sup> m/L Se treated; (C) 10<sup>-8</sup> m/L Se treated.

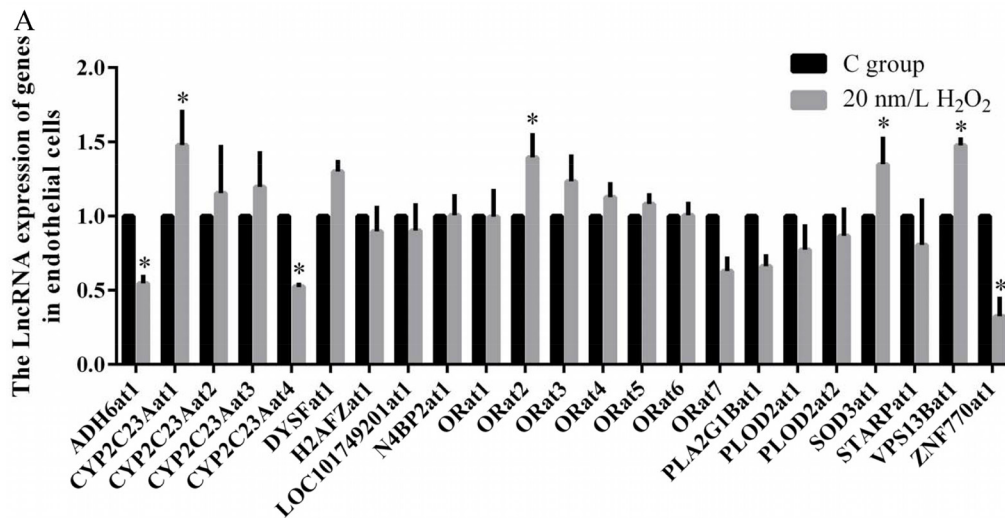

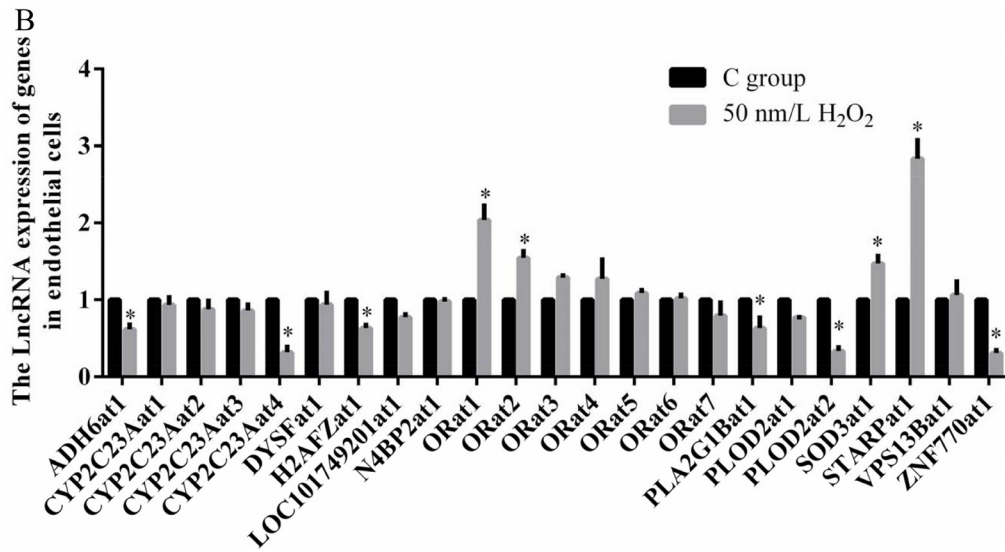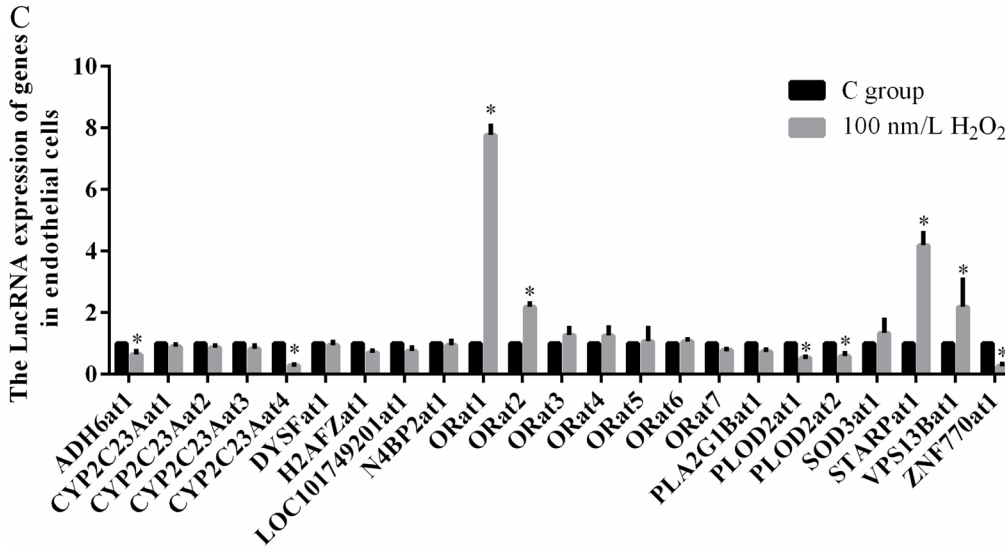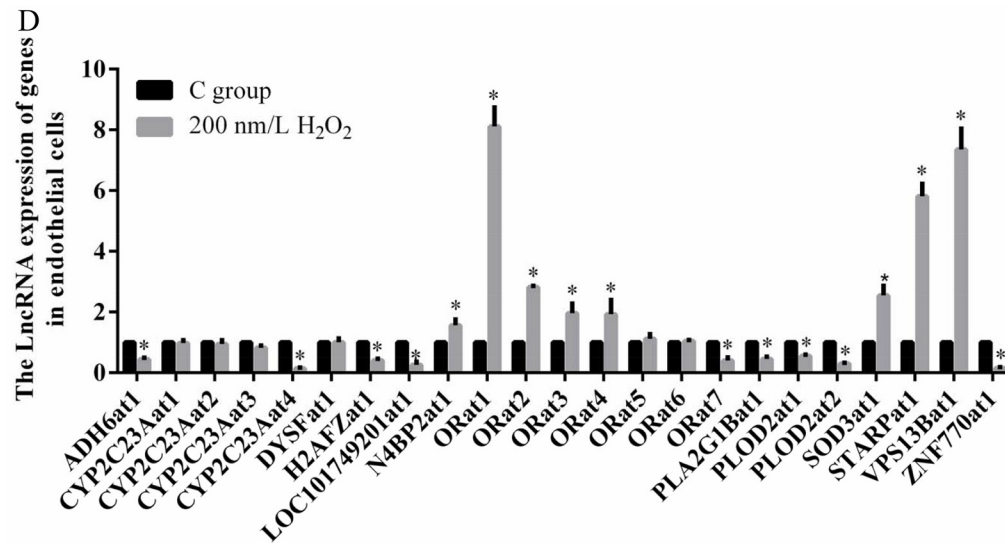

Supplementary Figure 2: Effects of H<sub>2</sub>O<sub>2</sub> on the relative mRNA levels in VECs. (A) 20 nm/L H<sub>2</sub>O<sub>2</sub> treated; (B) 50 nm/L H<sub>2</sub>O<sub>2</sub> treated; (C) 100 nm/L H<sub>2</sub>O<sub>2</sub> treated; (D) 200 nm/L H<sub>2</sub>O<sub>2</sub> treated.
